# Supplementary material for: Genome assembly of the Pink Ipê (Handroanthus impetiginosus, Bignoniaceae), a highly valued, ecologically keystone Neotropical timber forest tree
Source: PubMed Central journal article supplement (PMC5905499; doi:10.1093/gigascience/gix125), 2017-12-13
Supplement: gix125_response_to_reviewer_comments_revision_1.pdf [file gix125_response_to_reviewer_comments_revision_1.pdf]

## **Author's Response To Reviewer Comments**

Dr Hans Zauner  
Assistant Editor  
GigaScience

We double checked the manuscript and perform minor corrections.

We also moved Figure S1 (ipê photo) to the main-text (it is now Figure 1) and change figure and supplemental material numbers.

Hope our changes are satisfactory.

All the best  
Rosane Collevatti
